# Supplementary material for: Mechanistic insights into CO2 reduction to CO by group 5 transition metal monoxide cations
Source: Royal Society of Chemistry journal article supplement (doi:10.1039/d4cp03278k), 2024-01-01
Supplement: d4cp03278k1.pdf [file d4cp03278k1.pdf]

Supporting information for publication

## Mechanistic insights into CO<sub>2</sub> Reduction to CO by Group 5 Transition Metal Monoxide Cations

Haili Yu,<sup>1,†</sup> Jia Han,<sup>2,†,\*</sup> Quyan Su,<sup>1</sup> Pengcheng Liu,<sup>3</sup> Shilin Liu,<sup>1,2</sup> Xiaoguo Zhou<sup>1,2,\*</sup>

1. *Department of Chemical Physics, University of Science and Technology of China, Hefei 230026, China*
2. *Hefei National Research Center for Physical Sciences at the Microscale, University of Science and Technology of China, Hefei 230026, China*
3. *Anhui Institute of Optics and Fine Mechanics, Hefei Institutes of Physical Science, Chinese Academy of Sciences, Hefei 230031, China*

### Contents:

**Figure S1.** Optimized structures of MO<sup>+</sup> and MO<sub>2</sub><sup>+</sup> (M = V, Nb, Ta) cations at the singlet and triplet energy states at the PBE0-D3(BJ)/def2-TZVP level of theory together with their relative energies calculated at the U/UCCSD(T)/def2-QZVPP level of theory. Bond lengths are noted in Å.

**Table S1.** Triple spin contamination ⟨S<sup>2</sup>⟩ values for the relevant complexes were calculated at the PBE0-D3(BJ)/def2-TZVP level of theory.

**Table S2.** Cartesian coordinates for all optimized geometry of reactants, intermediates, transition states, products, and minimum energy crossing points at the PBE0-D3(BJ)/def2-TZVP level of theory.

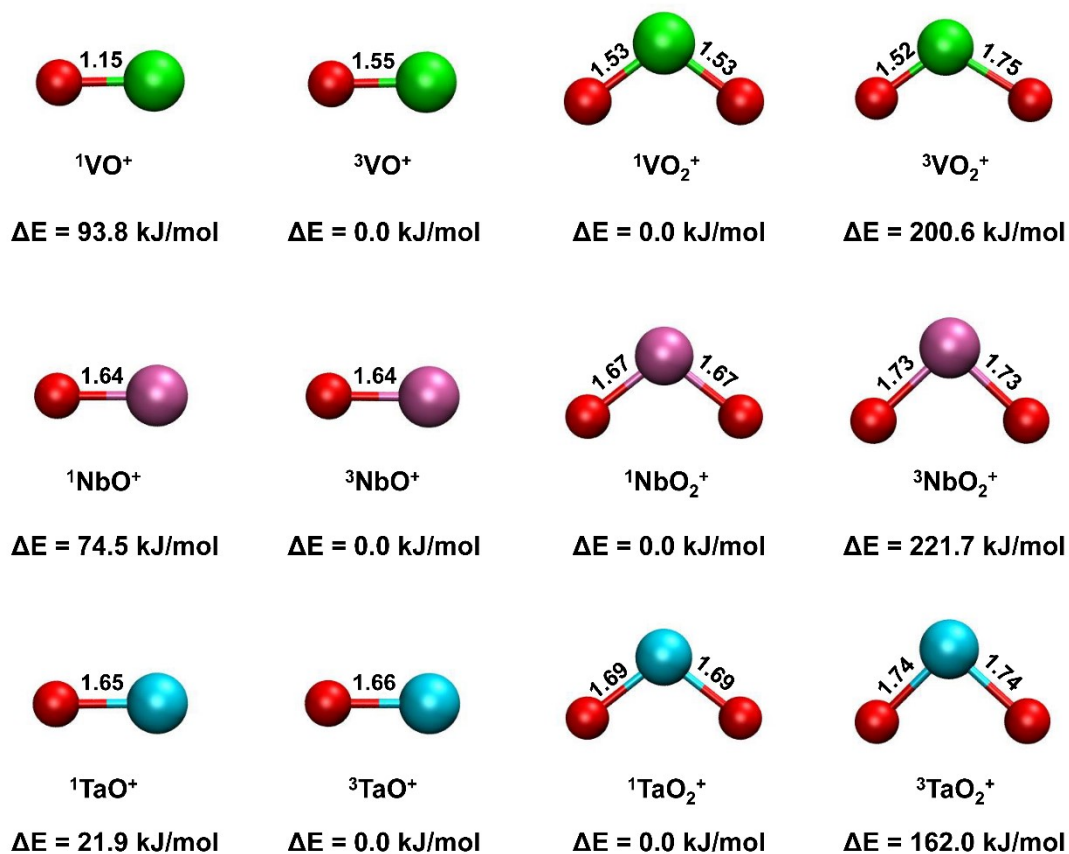

**Figure S1.** Optimized structures of  $\text{MO}^+$  and  $\text{MO}_2^+$  ( $M = \text{V}, \text{Nb}, \text{Ta}$ ) cations at the singlet and triplet energy states at the PBE0-D3(BJ)/def2-TZVP level of theory together with their relative energies calculated at the U/UCCSD(T)/def2-QZVPP level of theory. Bond lengths are noted in Å.

**Table S1.** Triple spin contamination  $\langle S^2 \rangle$  values for the relevant complexes were calculated at the PBE0-D3(BJ)/def2-TZVP level of theory.

|                                    | $\langle S^2 \rangle$ value |                 |                   |                 |
|------------------------------------|-----------------------------|-----------------|-------------------|-----------------|
|                                    | <sup>3</sup> RC             | <sup>3</sup> TS | <sup>3</sup> MECP | <sup>3</sup> PC |
| <sup>3</sup> VO <sup>+</sup> -OCO  | 2.054                       | 2.027           | 2.039             | 2.012           |
| <sup>3</sup> NbO <sup>+</sup> -OCO | 2.019                       | 2.016           | 2.018             | 2.011           |
| <sup>3</sup> TaO <sup>+</sup> -OCO | 2.014                       | 2.014           | 2.014             | 2.014           |

**Table S2.** Cartesian coordinates for all optimized geometry of reactants, intermediates, transition states, products, and minimum energy crossing points at the PBE0-D3(BJ)/def2-TZVP level of theory.

| ${}^1\text{VO}^+$                        |             |             |             |
|------------------------------------------|-------------|-------------|-------------|
|                                          | x           | y           | z           |
| V                                        | 0.00000000  | 0.00000000  | 0.39108400  |
| O                                        | 0.00000000  | 0.00000000  | -1.12436700 |
| ${}^3\text{VO}^+$                        |             |             |             |
|                                          | x           | y           | z           |
| V                                        | 0.00000000  | 0.00000000  | 0.39946300  |
| O                                        | 0.00000000  | 0.00000000  | -1.14845600 |
| ${}^1\text{VO}_2^+$                      |             |             |             |
|                                          | x           | y           | z           |
| V                                        | 0.00000000  | 0.37970400  | 0.00000000  |
| O                                        | 1.22387600  | -0.54580200 | 0.00000000  |
| O                                        | -1.22387600 | -0.54584700 | 0.00000000  |
| ${}^3\text{VO}_2^+$                      |             |             |             |
|                                          | x           | y           | z           |
| V                                        | 0.00000000  | 0.37933000  | 0.00000000  |
| O                                        | 1.34054000  | -0.74677200 | 0.00000000  |
| O                                        | -1.34054000 | -0.34380100 | 0.00000000  |
| ${}^1\text{RC}(\text{VO}^+-\text{CO}_2)$ |             |             |             |
|                                          | x           | y           | z           |
| V                                        | 1.18092300  | -0.28626100 | -0.00000900 |
| O                                        | 2.29898100  | 0.75271500  | 0.00000700  |
| C                                        | -2.08543800 | 0.03146700  | 0.00000700  |
| O                                        | -0.94098800 | -0.24931300 | 0.00002900  |
| O                                        | -3.18906900 | 0.29599900  | -0.00001600 |
| ${}^1\text{TS}(\text{VO}^+-\text{CO}_2)$ |             |             |             |
|                                          | x           | y           | z           |
| V                                        | 0.74298600  | 0.18487500  | -0.34360500 |
| O                                        | 1.40374400  | -0.88828900 | 0.52064400  |
| C                                        | -1.17144600 | -0.18677600 | -0.12301700 |
| O                                        | -0.39130400 | 0.96652500  | 0.62014800  |
| O                                        | -2.26994100 | -0.46967200 | -0.06066500 |

**<sup>1</sup>PC(VO<sup>+</sup>-CO<sub>2</sub>)**

|   | x           | y           | z           |
|---|-------------|-------------|-------------|
| V | 0.64230100  | 0.00004600  | -0.37437100 |
| O | 0.94945600  | -1.23506900 | 0.50361100  |
| O | 0.94481000  | 1.23681500  | 0.50299800  |
| C | -1.51921900 | -0.00109500 | -0.09946700 |
| O | -2.60146500 | -0.00105900 | 0.14430700  |

**<sup>3</sup>RC(VO<sup>+</sup>-CO<sub>2</sub>)**

|   | x           | y           | z           |
|---|-------------|-------------|-------------|
| V | -1.19947900 | -0.32358200 | 0.00000100  |
| O | -2.13260000 | 0.89480400  | -0.00000100 |
| C | 2.04311700  | 0.02103900  | -0.00000100 |
| O | 3.13430900  | 0.33431000  | 0.00000200  |
| O | 0.91445400  | -0.31459400 | -0.00000400 |

**<sup>3</sup>TS(VO<sup>+</sup>-CO<sub>2</sub>)**

|   | x           | y           | z           |
|---|-------------|-------------|-------------|
| V | 0.78506100  | 0.12856200  | -0.33277000 |
| O | 1.44744000  | -0.91644500 | 0.56781900  |
| C | -1.29951300 | -0.29271500 | -0.16731400 |
| O | -0.35138100 | 1.26970900  | 0.48817000  |
| O | -2.37847300 | -0.50334300 | 0.02621100  |

**<sup>1</sup>PC(VO<sup>+</sup>-CO<sub>2</sub>)**

|   | x           | y           | z           |
|---|-------------|-------------|-------------|
| V | -0.60984000 | -0.08442500 | -0.35630200 |
| O | -1.14116400 | 1.40958300  | 0.41637500  |
| O | -0.84953400 | -1.31451300 | 0.52247700  |
| C | 1.52072200  | 0.04997700  | -0.08826500 |
| O | 2.60344600  | 0.11016900  | 0.15171500  |

**MECP (V)**

|   | x           | y           | z           |
|---|-------------|-------------|-------------|
| V | 0.73380820  | 0.14672348  | -0.37627841 |
| O | 1.33683748  | -0.79796979 | 0.62767443  |
| C | -1.09543209 | -0.03621188 | 0.05804728  |
| O | -0.54558239 | 1.02104363  | 0.55822178  |
| O | -2.07937961 | -0.61774495 | -0.14763126 |

**<sup>1</sup>NbO<sup>+</sup>**

|    | x          | y          | z           |
|----|------------|------------|-------------|
| Nb | 0.00000000 | 0.00000000 | 0.26698300  |
| O  | 0.00000000 | 0.00000000 | -1.36828800 |

**<sup>3</sup>NbO<sup>+</sup>**

|    | x          | y          | z           |
|----|------------|------------|-------------|
| Nb | 0.00000000 | 0.00000000 | 0.26698300  |
| O  | 0.00000000 | 0.00000000 | -1.36828800 |

**<sup>1</sup>NbO<sub>2</sub><sup>+</sup>**

|    | x           | y           | z          |
|----|-------------|-------------|------------|
| Nb | 0.00000000  | 0.28980100  | 0.00000000 |
| O  | 1.30325300  | -0.74261400 | 0.00000000 |
| O  | -1.30325300 | -0.74261400 | 0.00000000 |

**<sup>3</sup>NbO<sub>2</sub><sup>+</sup>**

|    | x           | y           | z          |
|----|-------------|-------------|------------|
| Nb | 0.00000000  | 0.33428900  | 0.00000000 |
| O  | 1.25584200  | -0.85559400 | 0.00000000 |
| O  | -1.25584200 | -0.85763500 | 0.00000000 |

**<sup>1</sup>RC(NbO<sup>+</sup>-CO<sub>2</sub>)**

|    | x           | y           | z           |
|----|-------------|-------------|-------------|
| Nb | 0.93281700  | -0.22484400 | -0.00022300 |
| O  | 2.02053400  | 1.00969100  | 0.00030600  |
| C  | -2.48775400 | 0.05653500  | 0.00029200  |
| O  | -3.59220000 | 0.32240400  | -0.00081000 |
| O  | -1.34320700 | -0.22216900 | 0.00142800  |

**<sup>1</sup>TS1(NbO<sup>+</sup>-CO<sub>2</sub>)**

|    | x           | y           | z           |
|----|-------------|-------------|-------------|
| Nb | -0.80117700 | -0.21093700 | -0.16631900 |
| O  | -1.19326400 | 1.26113800  | 0.44730100  |
| C  | 1.89658700  | -0.02816900 | 0.10473100  |
| O  | 2.73965300  | 0.53642400  | -0.41778300 |
| O  | 1.13720200  | -0.69538200 | 0.74432100  |

**<sup>1</sup>IM(NbO<sup>+</sup>-CO<sub>2</sub>)**

|    | x           | y           | z           |
|----|-------------|-------------|-------------|
| Nb | -0.65417300 | -0.20070700 | -0.20482100 |
| O  | -1.19186500 | 1.16513100  | 0.53056800  |
| C  | 1.48762400  | 0.06314900  | 0.02452200  |
| O  | 2.47330400  | 0.54091300  | -0.36903900 |
| O  | 0.95548000  | -0.72478400 | 0.86978500  |

**<sup>1</sup>TS2(NbO<sup>+</sup>-CO<sub>2</sub>)**

|    | x           | y           | z           |
|----|-------------|-------------|-------------|
| Nb | -0.61518300 | -0.21187400 | -0.19760000 |
| O  | 0.75738200  | -0.66162400 | 0.92822400  |
| O  | -1.22374700 | 1.18810500  | 0.44198700  |
| C  | 1.43372400  | 0.16327000  | -0.14933400 |
| O  | 2.54388600  | 0.43692200  | -0.24551300 |

**<sup>1</sup>PC(NbO<sup>+</sup>-CO<sub>2</sub>)**

|    | x           | y           | z           |
|----|-------------|-------------|-------------|
| Nb | -0.53541700 | 0.00022000  | -0.29491100 |
| O  | -0.74452200 | -1.31578400 | 0.72364400  |
| O  | -0.73409400 | 1.31911900  | 0.72217900  |
| C  | 1.79095200  | -0.00266300 | -0.08671800 |
| O  | 2.87941300  | -0.00246300 | 0.13063600  |

**<sup>3</sup>RC(NbO<sup>+</sup>-CO<sub>2</sub>)**

|    | x           | y           | z           |
|----|-------------|-------------|-------------|
| Nb | -0.97644400 | -0.24815500 | -0.00008800 |
| O  | 1.22606400  | -0.40091800 | 0.00056900  |
| O  | -1.39411600 | 1.34679800  | 0.00015300  |
| C  | 2.33905900  | -0.01645700 | -0.00000700 |
| O  | 3.41803400  | 0.33825800  | -0.00026700 |

**<sup>3</sup>TS(NbO<sup>+</sup>-CO<sub>2</sub>)**

|    | x           | y           | z           |
|----|-------------|-------------|-------------|
| Nb | -0.65343400 | -0.14254500 | -0.21282500 |
| O  | 0.70644600  | -1.21476200 | 0.69028900  |
| O  | -1.11684100 | 1.19908700  | 0.64721500  |
| C  | 1.52878600  | 0.28246300  | -0.20568800 |
| O  | 2.61265400  | 0.53437000  | -0.09250900 |

**<sup>3</sup>PC(NbO<sup>+</sup>-CO<sub>2</sub>)**

|    | x           | y           | z           |
|----|-------------|-------------|-------------|
| Nb | 0.45624400  | -0.06326700 | -0.28058700 |
| O  | 1.14954400  | 1.46557800  | 0.58208200  |
| O  | 0.65827400  | -1.38827600 | 0.70158900  |
| C  | -1.74735600 | 0.09467700  | -0.04565100 |
| O  | -2.83554900 | 0.17593400  | 0.18857400  |

**MECP(Nb)**

|    | x           | y           | z           |
|----|-------------|-------------|-------------|
| Nb | -0.67131791 | -0.19751573 | -0.20539938 |
| O  | -1.19814151 | 1.16174089  | 0.54995712  |
| C  | 1.54222535  | 0.04437916  | 0.04809414  |
| O  | 2.48694996  | 0.56497047  | -0.38051784 |
| O  | 0.99502682  | -0.74772761 | 0.84716191  |

**<sup>1</sup>TaO<sup>+</sup>**

|    | x          | y          | z           |
|----|------------|------------|-------------|
| Ta | 0.00000000 | 0.00000000 | 0.16301900  |
| O  | 0.00000000 | 0.00000000 | -1.48754800 |

**<sup>3</sup>TaO<sup>+</sup>**

|    | x          | y          | z           |
|----|------------|------------|-------------|
| Ta | 0.00000000 | 0.00000000 | 0.16379600  |
| O  | 0.00000000 | 0.00000000 | -1.49463800 |

**<sup>1</sup>TaO<sub>2</sub><sup>+</sup>**

|    | x           | y           | z          |
|----|-------------|-------------|------------|
| Ta | 0.00000000  | 0.19227700  | 0.00000000 |
| O  | 1.34512000  | -0.87726300 | 0.00000000 |
| O  | -1.34512000 | -0.87726300 | 0.00000000 |

**<sup>3</sup>TaO<sub>2</sub><sup>+</sup>**

|    | x           | y           | z          |
|----|-------------|-------------|------------|
| Ta | 0.00000000  | 0.21654700  | 0.00000000 |
| O  | 1.25423500  | -0.98809700 | 0.00000000 |
| O  | -1.25423500 | -0.98789500 | 0.00000000 |

**<sup>1</sup>RC(TaO<sup>+</sup>-CO<sub>2</sub>)**

|    | x           | y           | z           |
|----|-------------|-------------|-------------|
| Ta | 0.66852100  | -0.12950300 | 0.00001400  |
| O  | 0.58754300  | 1.53205900  | -0.00005800 |
| O  | -1.35798300 | -0.58639600 | -0.00013600 |
| C  | -2.44691400 | -0.10379600 | -0.00002100 |
| O  | -3.49462500 | 0.31389700  | 0.00007900  |



**<sup>1</sup>TS(TaO<sup>+</sup>-CO<sub>2</sub>)**

|    | x           | y           | z           |
|----|-------------|-------------|-------------|
| Ta | -0.57192600 | -0.14704100 | -0.07295700 |
| O  | -0.81412100 | 1.46726200  | 0.24730800  |
| O  | 1.26378700  | -0.43258400 | 0.76516400  |
| C  | 2.17281600  | -0.01349500 | 0.07973500  |
| O  | 3.13954400  | 0.31719000  | -0.40654100 |

**<sup>1</sup>PC(TaO<sup>+</sup>-CO<sub>2</sub>)**

|    | x           | y           | z           |
|----|-------------|-------------|-------------|
| Ta | -0.38679400 | -0.00002600 | -0.18906100 |
| O  | -0.42341400 | 1.33632000  | 0.86530400  |
| O  | -0.42311700 | -1.33629000 | 0.86533300  |
| C  | 1.87355800  | 0.00037200  | -0.09894200 |
| O  | 2.97085400  | -0.00006900 | 0.06875400  |

**<sup>3</sup>RC(TaO<sup>+</sup>-CO<sub>2</sub>)**

|    | x           | y           | z           |
|----|-------------|-------------|-------------|
| Ta | 0.67937000  | -0.14352000 | -0.00001200 |
| O  | 0.79546000  | 1.52332600  | 0.00004400  |
| O  | -1.45185600 | -0.48170100 | 0.00011100  |
| C  | -2.55644700 | -0.06204900 | 0.00005600  |
| O  | -3.62552000 | 0.31453600  | -0.00008600 |

**<sup>3</sup>TS(TaO<sup>+</sup>-CO<sub>2</sub>)**

|    | x           | y           | z           |
|----|-------------|-------------|-------------|
| Ta | -0.47271100 | -0.08719300 | -0.11464300 |
| O  | -0.60698900 | 1.41545700  | 0.64418500  |
| O  | 0.86005300  | -1.24632100 | 0.71605900  |
| C  | 1.69320700  | 0.23486200  | -0.19105300 |
| O  | 2.79051800  | 0.45035100  | -0.17083800 |

**<sup>3</sup>PC(TaO<sup>+</sup>-CO<sub>2</sub>)**

|    | x           | y           | z           |
|----|-------------|-------------|-------------|
| Ta | -0.29092400 | 0.01767900  | -0.19118000 |
| O  | -0.53721700 | 1.40774400  | 0.73264600  |
| O  | -1.26566000 | -1.27069400 | 0.74137900  |
| C  | 1.93368600  | -0.11453300 | -0.01361300 |
| O  | 3.00729200  | -0.21247300 | 0.28069900  |

**MECP(Ta)**

|    | x           | y           | z           |
|----|-------------|-------------|-------------|
| Ta | -0.48989700 | -0.13802500 | -0.10417400 |
| O  | -0.85970900 | 1.39144400  | 0.44912000  |
| O  | 1.19175900  | -0.61118700 | 0.91456200  |
| C  | 1.81283900  | 0.03310200  | 0.02990900  |
| O  | 2.77862600  | 0.45439800  | -0.43553100 |
